Articles of interest in other COB journals

From *Journal of Cell Science*

**Src and Wnt signaling regulate dynactin accumulation to the P2-EMS cell border in *C. elegans* embryos**

Haining Zhang, Ahna R. Skop and John G. White

Zhang, H. et al. 2008. *J. Cell Sci.* doi: 10.1242/jcs.015966

**G $\alpha_o$  mediates WNT-JNK signaling through Dishevelled 1 and 3, RhoA family members, and MEKK 1 and 4 in mammalian cells**

Rama Kamesh Bikkavilli, Michael E. Feigin and Craig C. Malbon

Bikkavilli, R. K. et al. 2008. *J. Cell Sci.* doi: 10.1242/jcs.021964
